# Supplementary material
Source: HighWire-hosted journal article supplement (https://bmjopenquality.bmj.com/content/11/4/e001862)
Supplement: inline-supplementary-material-1 [file inline-supplementary-material-1.pdf]

## Contributory Factors Analysis (x all that apply)

| <b>Patient Factors and Patient / Family involvement</b>             |                                                                                           |  |
|---------------------------------------------------------------------|-------------------------------------------------------------------------------------------|--|
| Co-morbidity /Complexity/ seriousness of condition                  | Limited options to treat                                                                  |  |
| Poor physical condition (malnourished, dehydrated, obese)           | Lifestyle (smoking/drinking/drugs/diet)                                                   |  |
| Cultural / religious beliefs                                        | Engaging in high risk activity                                                            |  |
| Language barrier                                                    | Ineffective involvement in treatment and decision                                         |  |
| Learning disability                                                 | Information from patient/carer disregarded                                                |  |
| Lack of mental capacity                                             | Patient engagement with services and staff                                                |  |
| Existing mental health disorder                                     | Relationships between Staff and patient/ family                                           |  |
| Lack of support networks i.e. Mental Health Service                 | Relationships between Patient and Family                                                  |  |
| <b>Communication</b>                                                |                                                                                           |  |
| Ambiguous verbal communication / body language                      | Lack of information to patients                                                           |  |
| Poor verbal communication                                           | Lack of or inaccurate patient records                                                     |  |
| Communication not received                                          | Illegible Patient Records                                                                 |  |
| Incorrect Person / Place / Method                                   | Patient Records Volumes Issue                                                             |  |
| Lack of communication to staff of risks (Alerts)                    | Records incomplete /not contemporaneous                                                   |  |
| Inadequate patient identification                                   | Records not stored together /unavailable                                                  |  |
| Lack of communication plan                                          | Lack of feedback monitoring of communication                                              |  |
| Ineffective communication between staff                             | Ineffective communication with other agencies                                             |  |
| Ineffective communication flow up, down and across the organisation | Lack of effective communication to patients relatives/ carers of risks and incidents      |  |
| <b>Staff Factors</b>                                                |                                                                                           |  |
| Disability                                                          | Mental Illness/ Mental Impairment                                                         |  |
| Lack of motivation low job satisfaction/ boredom                    | Cultural Beliefs or Language                                                              |  |
| Overload / Fatigue /stress                                          | Domestic / lifestyle problems                                                             |  |
| Distraction / attention deficit                                     | Low self-confidence / over confidence                                                     |  |
| Situation Awareness: Preoccupation /Narrowed focus                  | Expectation/Confirmation bias: Perception / viewpoint affected by information or mindset. |  |
| <b>Team Factors</b>                                                 |                                                                                           |  |
| Lack of shared understanding                                        | Lack of team openness/ communication                                                      |  |
| Lack of decision making                                             | Inappropriate levels of assertiveness                                                     |  |
| Decision making Untimely /Inappropriate                             | Inadequate inter-professional challenge                                                   |  |
| Inadequate decision/ action caused by group influence               | Role/responsibility misunderstood not clearly defined                                     |  |
| Failure to seek support                                             | Ineffective leadership                                                                    |  |
| Lack of support network for staff                                   | Lack of risk plans / safety leadership                                                    |  |
| Routine rule violation                                              | Failure to address competence issues                                                      |  |
| <b>Equipment</b>                                                    |                                                                                           |  |
| Inconsistent / Unclear information                                  | Unclear display / controls                                                                |  |
| Poor working order / Unreliable                                     | Inappropriate Size                                                                        |  |
| Use of items with similar names / packaging                         | Incorrectly stored / placed for use                                                       |  |
| Poor maintenance programme                                          | Failure or power supply/water/piped gases etc.                                            |  |
| Equipment: not available/ insufficient /lack of backup              | Ineffective safety features / detection problems not obvious                              |  |
| Not intuitive/confusing design - colours/ symbols                   | Lack of or poor quality instructions                                                      |  |
| <b>Education and Training</b>                                       |                                                                                           |  |
| Lack of knowledge/skills                                            | Unfamiliar task / Inexperience                                                            |  |
| Inappropriate experience or lack of quality experience              | Training needs analysis not conducted or acted upon                                       |  |
| Inadequate supervision                                              | Lack of / Inadequate Mentorship                                                           |  |
| Lack of testing / assessment                                        | Training unavailable / inaccessible                                                       |  |
| Inappropriate content                                               | Inappropriate audience                                                                    |  |

| <b>Work Environment</b>                                                                       |                                                                     |  |
|-----------------------------------------------------------------------------------------------|---------------------------------------------------------------------|--|
| Unreliable / ineffective systems (Bookings, Patient Identification, ordering, referrals etc.) | Unreliable / ineffective admin infrastructure (bleeps, phones etc.) |  |
| Poor or inappropriate design (noise, lighting, visibility, temperature)                       | Lack of capacity- facility or fitting not available                 |  |
| Delays caused by system design / failure                                                      | Inadequate security                                                 |  |
| <b>Staff /Skill mix / Workload</b>                                                            |                                                                     |  |
| Inappropriate skill mix                                                                       | Use of temporary staff                                              |  |
| low staff to patient ratio                                                                    | High staff turnover                                                 |  |
| Shift related fatigue                                                                         | Excessive hours / lack of breaks                                    |  |
| Time pressure                                                                                 | Change of plan or Team                                              |  |
| Workload assessment not available /accurate                                                   | Distractions                                                        |  |
| Workload too high                                                                             |                                                                     |  |

| <b>Task Factors</b>                               |                                              |  |
|---------------------------------------------------|----------------------------------------------|--|
| <b>Guidelines, Policies and Procedures</b>        |                                              |  |
| Unavailable/Inaccessible: missing/non-existent    | Not adhered to/ followed                     |  |
| Inappropriately targeted /focussed                | Not up to date/ monitored / reviewed         |  |
| Unclear /Not Useable ambiguous /complex           | Inadequate plans and drills                  |  |
| <b>Decision making aids</b>                       |                                              |  |
| Aids not available (i.e. checklist, CTG machine)  | Lack of access to technical information      |  |
| Aids Not working /Usable                          | Lack of prioritisation of guidelines         |  |
| Difficulties accessing senior / specialist advice | Incomplete information (results, history)    |  |
| <b>Procedure or Task Design</b>                   |                                              |  |
| Poorly designed i.e. too complex                  | Staff do not agree with the task design      |  |
| Cannot complete in timely manner                  | Inappropriate transfer from other situations |  |
| Too many tasks to perform at the same time        | Insufficient opportunity to influence task   |  |
| Contradicting tasks                               | Appropriate automation not available         |  |
| Inadequate Audit, Quality Control, Assurance      | Lack of understandable feedback              |  |

| <b>Organisational and Other</b>                     |                                         |  |
|-----------------------------------------------------|-----------------------------------------|--|
| Lack of robust service level agreements / contracts | Lack of Service provision               |  |
| Bed Occupancy - Unplanned bed opening/ closures     | Locum/Agency Policy                     |  |
| Adverse impact of national policy / guidance        | Delayed discharge /transfer of care     |  |
| Theatre Capacity                                    | Accessibility/Admission                 |  |
| Detection/Escalation of deterioration               | Professional Isolation                  |  |
| Contractor or PFI related problem                   | Inadequate maintenance                  |  |
| <b>Safety Culture</b>                               |                                         |  |
| Acceptance of inadequate adherence to practice      | Communication of Risks - Alert Systems  |  |
| Disempowerment of staff to escalate or act          | Clinical versus the Managerial Model    |  |
| Hierarchical structure not conducive to openness    | Inadequate learning from past incidents |  |
| Financial /Efficiency rather than safety focussed   | Poor rule compliance                    |  |
| Inadequate open culture                             | Inadequate leadership                   |  |
